# Supplementary material
Source: PubMed Central journal article supplement (PMC2676572)

## Supplemental Figure 1

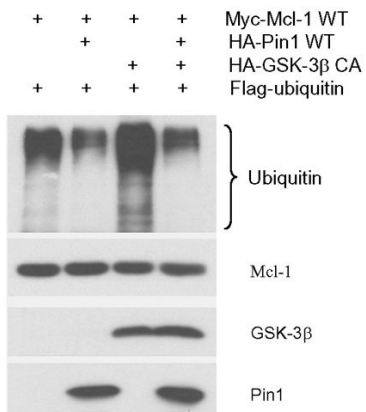

## Supplemental Figure 2

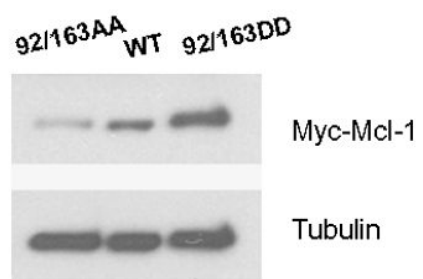

Supplemental Figure 3

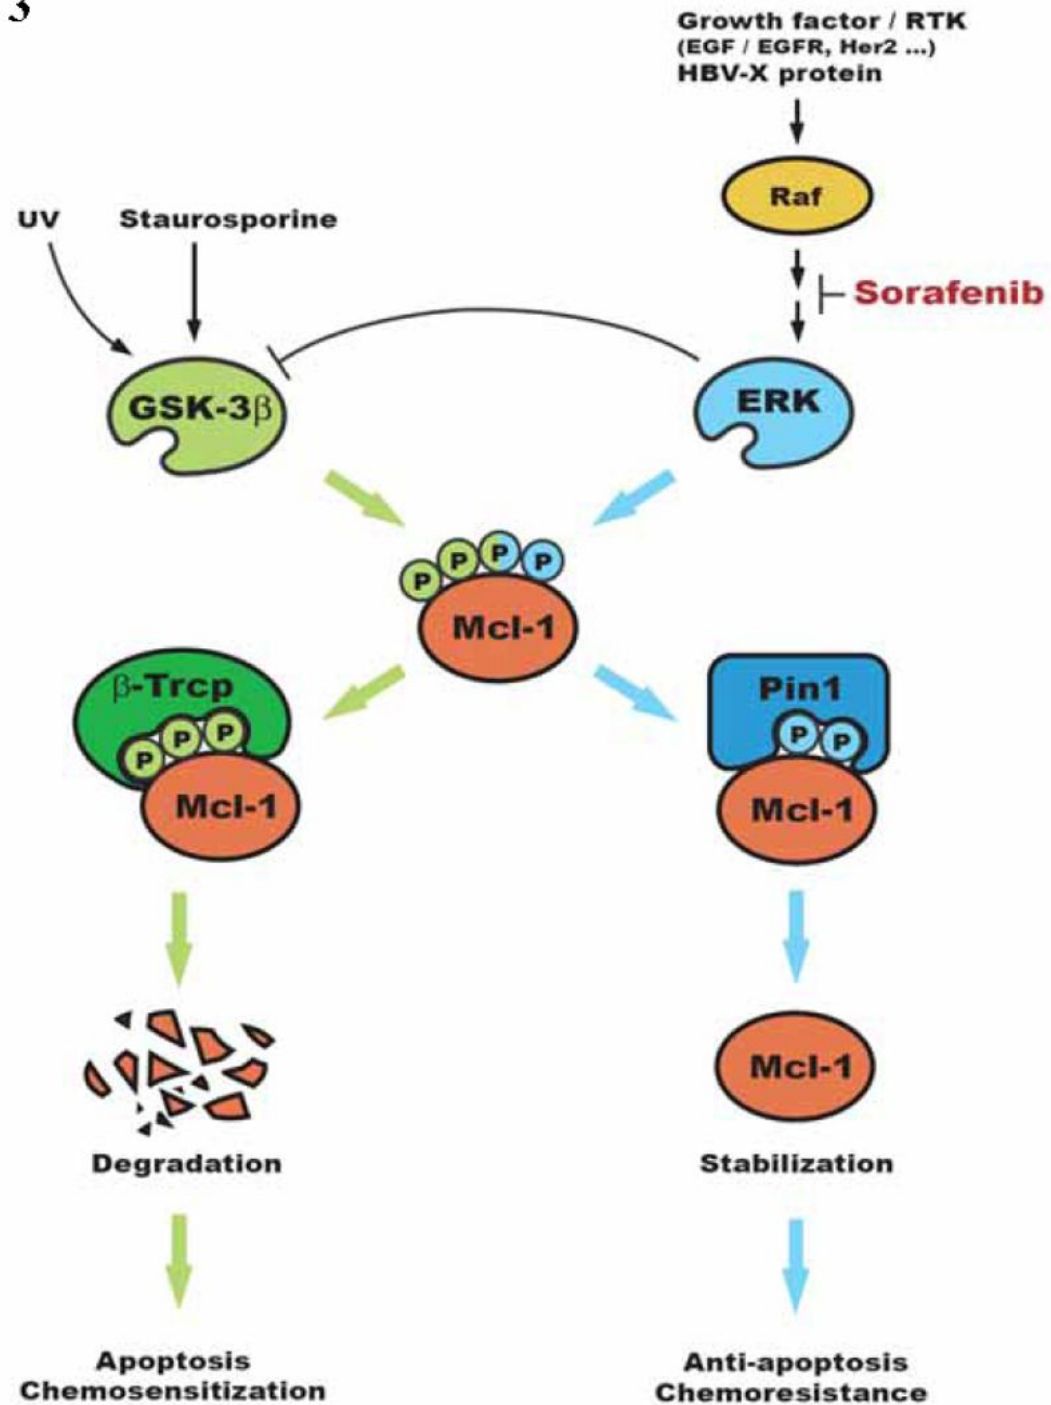

Supplement: NIHMS76170-supplement-Mcl1_Pin1_supplement.pdf [file NIHMS76170-supplement-Mcl1_Pin1_supplement.pdf]
